# Supplementary material for: Establishment and Validation of a New Analysis Strategy for the Study of Plant Endophytic Microorganisms
Source: Int J Mol Sci. 2022 Nov 17;23(22):14223. doi: 10.3390/ijms232214223 (PMC9697482; doi:10.3390/ijms232214223)
Supplement: Supplementary file 1 [file ijms-23-14223-s001.zip › supplementary table (Table S1).xls]

## Sheet: supplement table
Table S1. Transcriptome data of different plants
ID	Samples	Tissue
SRR908214	zea mays	kernel
SRR908215	zea mays	kernel
SRR909970	zea mays	kernel
SRR909971	zea mays	kernel
SRR909972	zea mays	kernel
SRR909999	zea mays	kernel
SRR910000	zea mays	kernel
SRR910001	zea mays	kernel
SRR910025	zea mays	kernel
SRR910026	zea mays	kernel
SRR910045	zea mays	kernel
SRR910046	zea mays	kernel
SRR910047	zea mays	kernel
SRR910048	zea mays	kernel
SRR910049	zea mays	kernel
SRR910110	zea mays	kernel
SRR910111	zea mays	kernel
SRR910116	zea mays	kernel
SRR910117	zea mays	kernel
SRR910118	zea mays	kernel
SRR910177	zea mays	kernel
SRR910178	zea mays	kernel
SRR910179	zea mays	kernel
SRR910180	zea mays	kernel
SRR910181	zea mays	kernel
SRR910202	zea mays	kernel
SRR910203	zea mays	kernel
SRR910204	zea mays	kernel
SRR910228	zea mays	kernel
SRR910229	zea mays	kernel
SRR910230	zea mays	kernel
SRR910231	zea mays	kernel
SRR910233	zea mays	kernel
SRR910293	zea mays	kernel
SRR910294	zea mays	kernel
SRR910295	zea mays	kernel
SRR910296	zea mays	kernel
SRR910317	zea mays	kernel
SRR910318	zea mays	kernel
SRR910319	zea mays	kernel
SRR910336	zea mays	kernel
SRR910338	zea mays	kernel
SRR910357	zea mays	kernel
SRR910387	zea mays	kernel
SRR910389	zea mays	kernel
SRR910390	zea mays	kernel
SRR910392	zea mays	kernel
SRR910414	zea mays	kernel
SRR910417	zea mays	kernel
SRR910500	zea mays	kernel
SRR910501	zea mays	kernel
SRR910584	zea mays	kernel
SRR910585	zea mays	kernel
SRR910586	zea mays	kernel
SRR910645	zea mays	kernel
SRR910646	zea mays	kernel
SRR910647	zea mays	kernel
SRR910648	zea mays	kernel
SRR910713	zea mays	kernel
SRR910732	zea mays	kernel
SRR910733	zea mays	kernel
SRR910734	zea mays	kernel
SRR910755	zea mays	kernel
SRR910756	zea mays	kernel
SRR910757	zea mays	kernel
SRR910758	zea mays	kernel
SRR910782	zea mays	kernel
SRR910784	zea mays	kernel
SRR910783	zea mays	kernel
SRR910786	zea mays	kernel
SRR910785	zea mays	kernel
SRR910810	zea mays	kernel
SRR910811	zea mays	kernel
SRR910816	zea mays	kernel
SRR910817	zea mays	kernel
SRR910818	zea mays	kernel
SRR910819	zea mays	kernel
SRR910843	zea mays	kernel
SRR910844	zea mays	kernel
SRR910846	zea mays	kernel
SRR910847	zea mays	kernel
SRR910848	zea mays	kernel
SRR910869	zea mays	kernel
SRR910870	zea mays	kernel
SRR910871	zea mays	kernel
SRR910872	zea mays	kernel
SRR910873	zea mays	kernel
SRR910874	zea mays	kernel
SRR910898	zea mays	kernel
SRR910899	zea mays	kernel
SRR910900	zea mays	kernel
SRR910901	zea mays	kernel
SRR910902	zea mays	kernel
SRR910909	zea mays	kernel
SRR910908	zea mays	kernel
SRR910910	zea mays	kernel
SRR910911	zea mays	kernel
SRR910912	zea mays	kernel
SRR910971	zea mays	kernel
SRR910972	zea mays	kernel
SRR910973	zea mays	kernel
SRR911136	zea mays	kernel
SRR911158	zea mays	kernel
SRR911157	zea mays	kernel
SRR911159	zea mays	kernel
SRR911186	zea mays	kernel
SRR911187	zea mays	kernel
SRR911188	zea mays	kernel
SRR911189	zea mays	kernel
SRR911208	zea mays	kernel
SRR911209	zea mays	kernel
SRR911210	zea mays	kernel
SRR911220	zea mays	kernel
SRR911221	zea mays	kernel
SRR911242	zea mays	kernel
SRR911243	zea mays	kernel
SRR911244	zea mays	kernel
SRR911245	zea mays	kernel
SRR911246	zea mays	kernel
SRR911270	zea mays	kernel
SRR911271	zea mays	kernel
SRR911272	zea mays	kernel
SRR911273	zea mays	kernel
SRR911296	zea mays	kernel
SRR911297	zea mays	kernel
SRR911298	zea mays	kernel
SRR911562	zea mays	kernel
SRR911626	zea mays	kernel
SRR911651	zea mays	kernel
SRR911653	zea mays	kernel
SRR911674	zea mays	kernel
SRR911695	zea mays	kernel
SRR911696	zea mays	kernel
SRR911720	zea mays	kernel
SRR911783	zea mays	kernel
SRR911787	zea mays	kernel
SRR911830	zea mays	kernel
SRR911831	zea mays	kernel
SRR911832	zea mays	kernel
SRR911882	zea mays	kernel
SRR911883	zea mays	kernel
SRR911912	zea mays	kernel
SRR911913	zea mays	kernel
SRR911914	zea mays	kernel
SRR911915	zea mays	kernel
SRR911936	zea mays	kernel
SRR911937	zea mays	kernel
SRR911938	zea mays	kernel
SRR911966	zea mays	kernel
SRR911967	zea mays	kernel
SRR911968	zea mays	kernel
SRR911974	zea mays	kernel
SRR911973	zea mays	kernel
SRR911993	zea mays	kernel
SRR911994	zea mays	kernel
SRR911995	zea mays	kernel
SRR912017	zea mays	kernel
SRR912018	zea mays	kernel
SRR912020	zea mays	kernel
SRR912045	zea mays	kernel
SRR912046	zea mays	kernel
SRR912051	zea mays	kernel
SRR912052	zea mays	kernel
SRR912053	zea mays	kernel
SRR912075	zea mays	kernel
SRR912077	zea mays	kernel
SRR912079	zea mays	kernel
SRR912101	zea mays	kernel
SRR912102	zea mays	kernel
SRR912103	zea mays	kernel
SRR912104	zea mays	kernel
SRR912106	zea mays	kernel
SRR912107	zea mays	kernel
SRR912135	zea mays	kernel
SRR912134	zea mays	kernel
SRR912136	zea mays	kernel
SRR912138	zea mays	kernel
SRR912137	zea mays	kernel
SRR912159	zea mays	kernel
SRR912160	zea mays	kernel
SRR912161	zea mays	kernel
SRR912162	zea mays	kernel
SRR912163	zea mays	kernel
SRR912164	zea mays	kernel
SRR912224	zea mays	kernel
SRR912165	zea mays	kernel
SRR912236	zea mays	kernel
SRR912238	zea mays	kernel
SRR912265	zea mays	kernel
SRR912266	zea mays	kernel
SRR912267	zea mays	kernel
SRR912287	zea mays	kernel
SRR912296	zea mays	kernel
SRR912297	zea mays	kernel
SRR912298	zea mays	kernel
SRR912299	zea mays	kernel
SRR912300	zea mays	kernel
SRR912301	zea mays	kernel
SRR912329	zea mays	kernel
SRR912328	zea mays	kernel
SRR912330	zea mays	kernel
SRR912331	zea mays	kernel
SRR912332	zea mays	kernel
SRR912334	zea mays	kernel
SRR912333	zea mays	kernel
SRR912335	zea mays	kernel
SRR912357	zea mays	kernel
SRR912336	zea mays	kernel
SRR912364	zea mays	kernel
SRR912358	zea mays	kernel
SRR912365	zea mays	kernel
SRR912366	zea mays	kernel
SRR912367	zea mays	kernel
SRR912394	zea mays	kernel
SRR912395	zea mays	kernel
SRR912396	zea mays	kernel
SRR912397	zea mays	kernel
SRR912398	zea mays	kernel
SRR912400	zea mays	kernel
SRR912399	zea mays	kernel
SRR912401	zea mays	kernel
SRR912402	zea mays	kernel
SRR912403	zea mays	kernel
SRR912404	zea mays	kernel
SRR912428	zea mays	kernel
SRR912429	zea mays	kernel
SRR912430	zea mays	kernel
SRR912431	zea mays	kernel
SRR912432	zea mays	kernel
SRR912433	zea mays	kernel
SRR912434	zea mays	kernel
SRR912435	zea mays	kernel
SRR912456	zea mays	kernel
SRR912457	zea mays	kernel
SRR912458	zea mays	kernel
SRR912460	zea mays	kernel
SRR912461	zea mays	kernel
SRR912462	zea mays	kernel
SRR912463	zea mays	kernel
SRR912464	zea mays	kernel
SRR912466	zea mays	kernel
SRR912467	zea mays	kernel
SRR912468	zea mays	kernel
SRR912514	zea mays	kernel
SRR912531	zea mays	kernel
SRR912532	zea mays	kernel
SRR912537	zea mays	kernel
SRR912538	zea mays	kernel
SRR912539	zea mays	kernel
SRR912540	zea mays	kernel
SRR912542	zea mays	kernel
SRR912543	zea mays	kernel
SRR912567	zea mays	kernel
SRR912569	zea mays	kernel
SRR912570	zea mays	kernel
SRR912571	zea mays	kernel
SRR912572	zea mays	kernel
SRR912573	zea mays	kernel
SRR912574	zea mays	kernel
SRR912575	zea mays	kernel
SRR912576	zea mays	kernel
SRR912598	zea mays	kernel
SRR912597	zea mays	kernel
SRR912599	zea mays	kernel
SRR912601	zea mays	kernel
SRR912602	zea mays	kernel
SRR912632	zea mays	kernel
SRR912631	zea mays	kernel
SRR912630	zea mays	kernel
SRR912634	zea mays	kernel
SRR912635	zea mays	kernel
SRR912636	zea mays	kernel
SRR912637	zea mays	kernel
SRR912638	zea mays	kernel
SRR912639	zea mays	kernel
SRR912641	zea mays	kernel
SRR912642	zea mays	kernel
SRR912643	zea mays	kernel
SRR912671	zea mays	kernel
SRR912672	zea mays	kernel
SRR912674	zea mays	kernel
SRR912675	zea mays	kernel
SRR912676	zea mays	kernel
SRR912677	zea mays	kernel
SRR912678	zea mays	kernel
SRR912679	zea mays	kernel
SRR912680	zea mays	kernel
SRR912681	zea mays	kernel
SRR912741	zea mays	kernel
SRR912682	zea mays	kernel
SRR912743	zea mays	kernel
SRR912742	zea mays	kernel
SRR912744	zea mays	kernel
SRR912745	zea mays	kernel
SRR912746	zea mays	kernel
SRR912748	zea mays	kernel
SRR912747	zea mays	kernel
SRR912749	zea mays	kernel
SRR912750	zea mays	kernel
SRR912751	zea mays	kernel
SRR912753	zea mays	kernel
SRR912752	zea mays	kernel
SRR912754	zea mays	kernel
SRR912760	zea mays	kernel
SRR912755	zea mays	kernel
SRR912761	zea mays	kernel
SRR912782	zea mays	kernel
SRR912784	zea mays	kernel
SRR912783	zea mays	kernel
SRR912785	zea mays	kernel
SRR912786	zea mays	kernel
SRR912787	zea mays	kernel
SRR912788	zea mays	kernel
SRR912789	zea mays	kernel
SRR912795	zea mays	kernel
SRR912796	zea mays	kernel
SRR912800	zea mays	kernel
SRR912821	zea mays	kernel
SRR912822	zea mays	kernel
SRR912823	zea mays	kernel
SRR912827	zea mays	kernel
SRR912824	zea mays	kernel
SRR912826	zea mays	kernel
SRR912825	zea mays	kernel
SRR912848	zea mays	kernel
SRR912849	zea mays	kernel
SRR912850	zea mays	kernel
SRR912851	zea mays	kernel
SRR912852	zea mays	kernel
SRR912854	zea mays	kernel
SRR912853	zea mays	kernel
SRR912855	zea mays	kernel
SRR912856	zea mays	kernel
SRR912876	zea mays	kernel
SRR912875	zea mays	kernel
SRR912877	zea mays	kernel
SRR912878	zea mays	kernel
SRR912879	zea mays	kernel
SRR912882	zea mays	kernel
SRR912881	zea mays	kernel
SRR912887	zea mays	kernel
SRR912888	zea mays	kernel
SRR912889	zea mays	kernel
SRR912891	zea mays	kernel
SRR912892	zea mays	kernel
SRR912893	zea mays	kernel
SRR912952	zea mays	kernel
SRR912954	zea mays	kernel
SRR912955	zea mays	kernel
SRR912958	zea mays	kernel
SRR912960	zea mays	kernel
SRR912962	zea mays	kernel
SRR912963	zea mays	kernel
SRR912964	zea mays	kernel
SRR912965	zea mays	kernel
SRR912983	zea mays	kernel
SRR912984	zea mays	kernel
SRR912985	zea mays	kernel
SRR912986	zea mays	kernel
SRR912987	zea mays	kernel
SRR913006	zea mays	kernel
SRR913008	zea mays	kernel
SRR913009	zea mays	kernel
SRR913014	zea mays	kernel
SRR913015	zea mays	kernel
SRR913016	zea mays	kernel
SRR913040	zea mays	kernel
SRR913041	zea mays	kernel
SRR21695952	zea mays	kernel
SRR9669031	zea mays	root
SRR9669030	zea mays	root
SRR9669029	zea mays	root
SRR9669028	zea mays	root
SRR9669033	zea mays	root
SRR9669038	zea mays	root
SRR9669032	zea mays	root
SRR14238787	zea mays	seedling leaf
SRR14238788	zea mays	seedling leaf
SRR14238789	zea mays	seedling leaf
SRR14238790	zea mays	seedling leaf
SRR14238791	zea mays	seedling leaf
SRR14238792	zea mays	seedling leaf
SRR14238793	zea mays	seedling leaf
SRR14238794	zea mays	seedling leaf
SRR14238795	zea mays	seedling leaf
SRR14238796	zea mays	seedling leaf
SRR14238797	zea mays	seedling leaf
SRR14238798	zea mays	seedling leaf
SRR14238799	zea mays	seedling leaf
SRR14238800	zea mays	seedling leaf
SRR14238801	zea mays	seedling leaf
SRR14238802	zea mays	seedling leaf
SRR14238803	zea mays	seedling leaf
SRR14238804	zea mays	seedling leaf
SRR14238805	zea mays	seedling leaf
SRR14238806	zea mays	seedling leaf
SRR14238807	zea mays	seedling leaf
SRR14238808	zea mays	seedling leaf
SRR14238809	zea mays	seedling leaf
SRR14238810	zea mays	seedling leaf
SRR14238811	zea mays	seedling leaf
SRR14238812	zea mays	seedling leaf
SRR18076302	zea mays	leaf
SRR18076303	zea mays	leaf
SRR18076304	zea mays	leaf
SRR18076308	zea mays	leaf
SRR18076310	zea mays	leaf
SRR18076312	zea mays	leaf
SRR18076313	zea mays	leaf
SRR18076314	zea mays	leaf
SRR18076315	zea mays	leaf
SRR18076316	zea mays	leaf
SRR18076317	zea mays	leaf
SRR18076320	zea mays	leaf
SRR18076325	zea mays	leaf
SRR18076326	zea mays	leaf
SRR18076306	zea mays	leaf
SRR18076311	zea mays	leaf
SRR18076319	zea mays	leaf
SRR18076321	zea mays	leaf
SRR18076322	zea mays	leaf
SRR18076305	zea mays	leaf
SRR18076307	zea mays	leaf
SRR18076309	zea mays	leaf
SRR18076318	zea mays	leaf
SRR18076323	zea mays	leaf
SRR18076324	zea mays	leaf
SRR18076327	zea mays	leaf
SRR21695951	zea mays	leaf
SRR21695953	Nicotiana tabacum	root
SRR21695954	Nicotiana tabacum	stem
SRR21695955	Pittosporaceae	leaf
SRR21695956	Osmanthus fragrans	leaf
SRR12318274	Phaseolus vulgaris
SRR12318275	Phaseolus vulgaris
SRR12318276	Phaseolus vulgaris
SRR12318277	Phaseolus vulgaris
SRR12318278	Phaseolus vulgaris
SRR12318279	Phaseolus vulgaris
SRR12318280	Phaseolus vulgaris
SRR12318281	Phaseolus vulgaris
SRR12318282	Phaseolus vulgaris
SRR12318283	Phaseolus vulgaris
SRR12318284	Phaseolus vulgaris
SRR12318285	Phaseolus vulgaris
SRR12318287	Phaseolus vulgaris
SRR12318290	Phaseolus vulgaris
SRR12318286	Phaseolus vulgaris
SRR12318288	Phaseolus vulgaris
SRR12318289	Phaseolus vulgaris
SRR12318291	Phaseolus vulgaris
SRR12318292	Phaseolus vulgaris
SRR12318293	Phaseolus vulgaris
SRR12318294	Phaseolus vulgaris
SRR12318295	Phaseolus vulgaris
SRR12318296	Phaseolus vulgaris
SRR12318297	Phaseolus vulgaris
SRR7693915	Phaseolus vulgaris
SRR7693916	Phaseolus vulgaris
SRR7693917	Phaseolus vulgaris
SRR7696192	Phaseolus vulgaris
SRR7696193	Phaseolus vulgaris
SRR7696194	Phaseolus vulgaris
SRR7696200	Phaseolus vulgaris
SRR7696201	Phaseolus vulgaris
SRR7696202	Phaseolus vulgaris
SRR7957432	Glycine max
SRR7957433	Glycine max
SRR7957434	Glycine max
SRR17326967	Polygonatum kingianum	root
SRR17326968	Polygonatum kingianum	root
SRR17326969	Polygonatum kingianum	root
SRR17326970	Polygonatum kingianum	root
SRR17326971	Polygonatum kingianum	root
SRR17326972	Polygonatum kingianum	root
SRR17326973	Polygonatum kingianum	root
SRR17326974	Polygonatum kingianum	root
SRR17326975	Polygonatum kingianum	root
SRR17326976	Polygonatum kingianum	root
SRR17326977	Polygonatum kingianum	root
SRR17326978	Polygonatum kingianum	root
